# Supplementary material for: Heterogeneous bimetallic Ni(OH)2-NiMoO4/NF as an efficient HER electrocatalyst for alkaline water splitting
Source: Royal Society of Chemistry journal article supplement (doi:10.1039/d3se00204g), 2023-01-01
Supplement: d3se00204g1.pdf [file d3se00204g1.pdf]

## Heterogeneous Bimetallic Ni(OH)<sub>2</sub>-NiMoO<sub>4</sub>/NF as an Efficient HER Electrocatalyst for Alkaline Water Splitting

Jianzhi Wang, Jie Yang, Yanjun Yu, Yanan Xue, Yu Luo, Ziyi Guo, Hongliang Yu, Hui Li\*, Faquan Yu\*

Key Laboratory for Green Chemical Process of Ministry of Education,  
Hubei Key Laboratory for Novel Reactor and Green Chemistry Technology  
Hubei Engineering Research Center for Advanced Fine Chemicals  
School of Chemical Engineering and Pharmacy,  
Wuhan Institute of Technology, Wuhan 430073, China

\*Corresponding author:

Faquan Yu, Professor, PhD; Hui Li, PhD.

Wuhan Institute of Technology

LiuFang Campus, No.206, Guanggu 1st road, Wuhan 430205, Hubei, China

mail address: [fyu@wit.edu.cn](mailto:fyu@wit.edu.cn); [sodium2008@163.com](mailto:sodium2008@163.com)

Tel: (86-27) 87194980; Fax: (86-27) 87194465

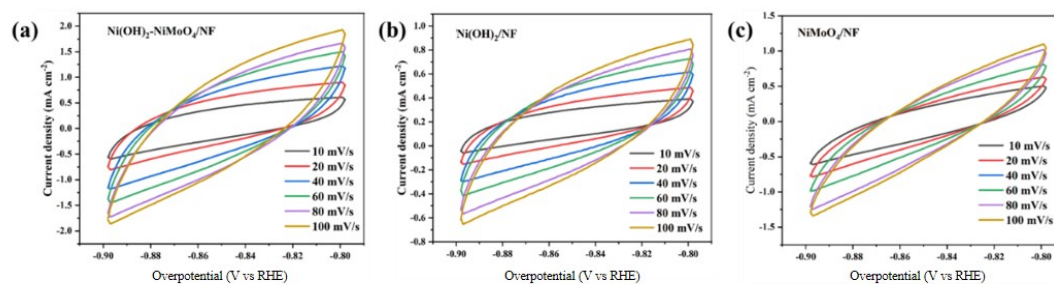

Figure S1. CV plots of Ni(OH)<sub>2</sub>-NiMoO<sub>4</sub>/NF, Ni(OH)<sub>2</sub>/NF and NiMoO<sub>4</sub>/NF in the Faradaic region at different scan rates in 1 M KOH.

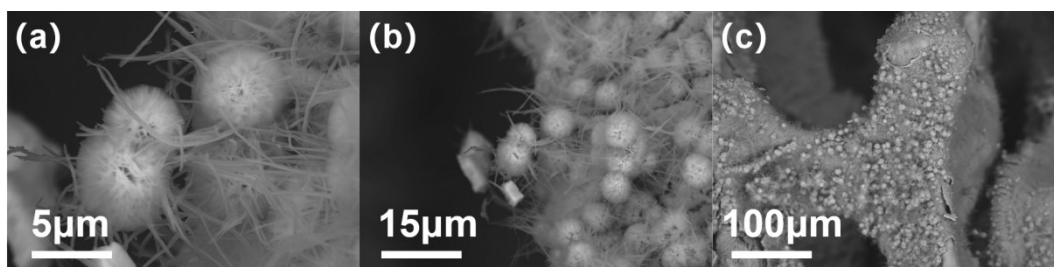

Figure S2. SEM images of Ni(OH)<sub>2</sub>-NiMoO<sub>4</sub>/NF after stability test.
